# Supplementary material for: Dimeric camptothecin-loaded RGD-modified targeted cationic polypeptide-based micelles with high drug loading capacity and redox-responsive drug release capability
Source: Royal Society of Chemistry journal article supplement (doi:10.1039/c7bm00791d), 2017-01-01
Supplement: c7bm00791d1.pdf [file c7bm00791d1.pdf]

## **Supplementary Information**

### **Dimeric camptothecin loaded RGD-targeting cationic polypeptide-based micelles with high drug loading and redox-responsive drug release**

Zhaopei Guo, Xingzhi Zhou, Mengze Xu, Huayu Tian, Xuesi Chen, Meiwan Chen\*

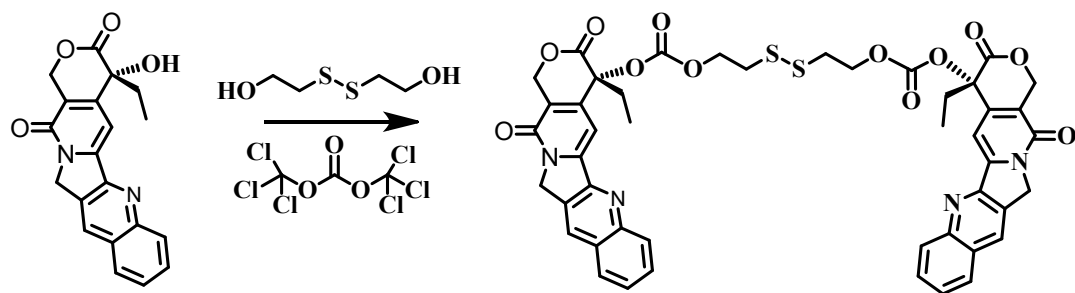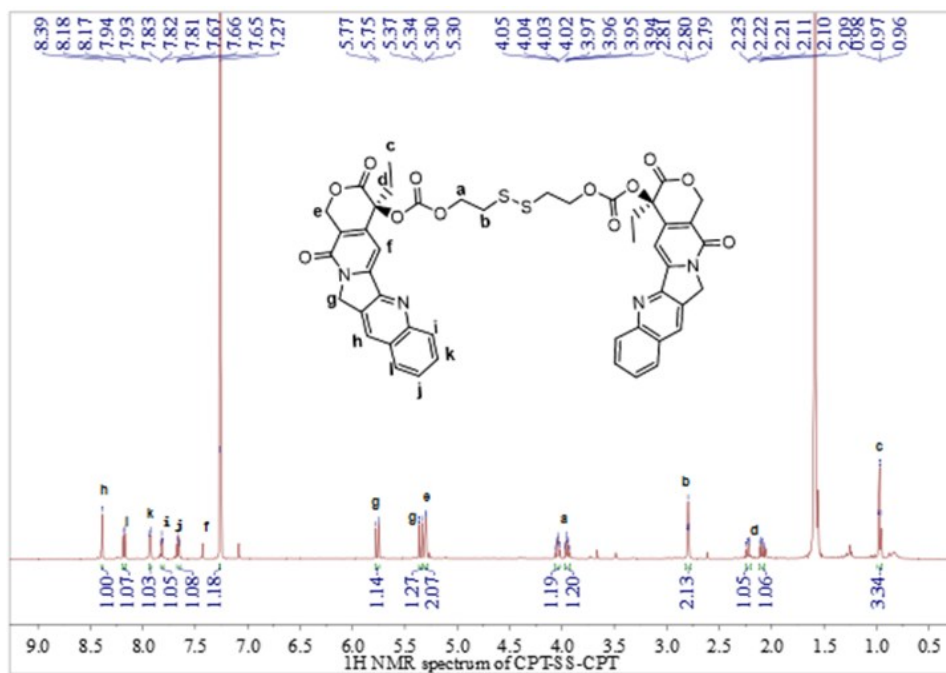

20170217 CPT-SS-CPT #292 RT: 11.27 AV: 1 NL: 8.20E5  
T: FTMS + c ESI Full ms [100.00-1200.00]

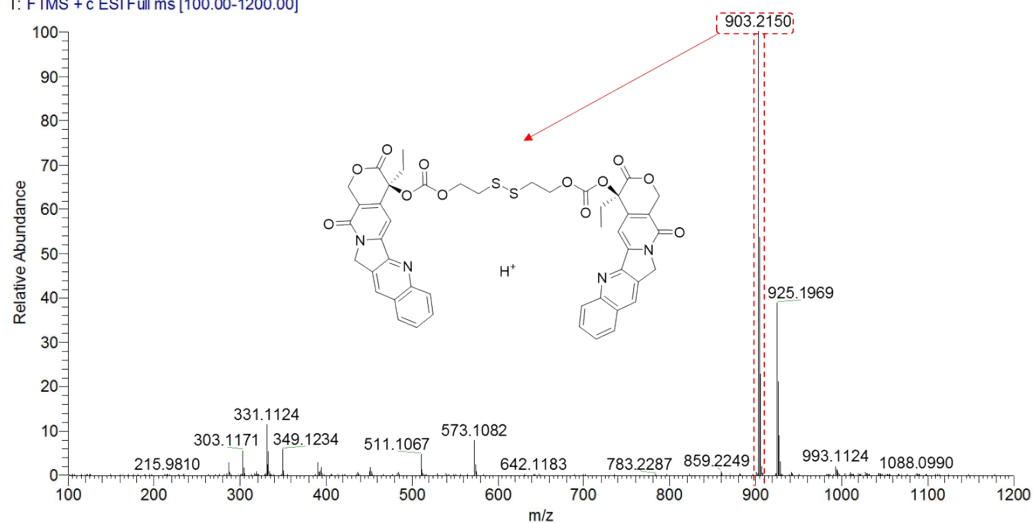

Figure S1 Preparation of DCPT and its characterization.

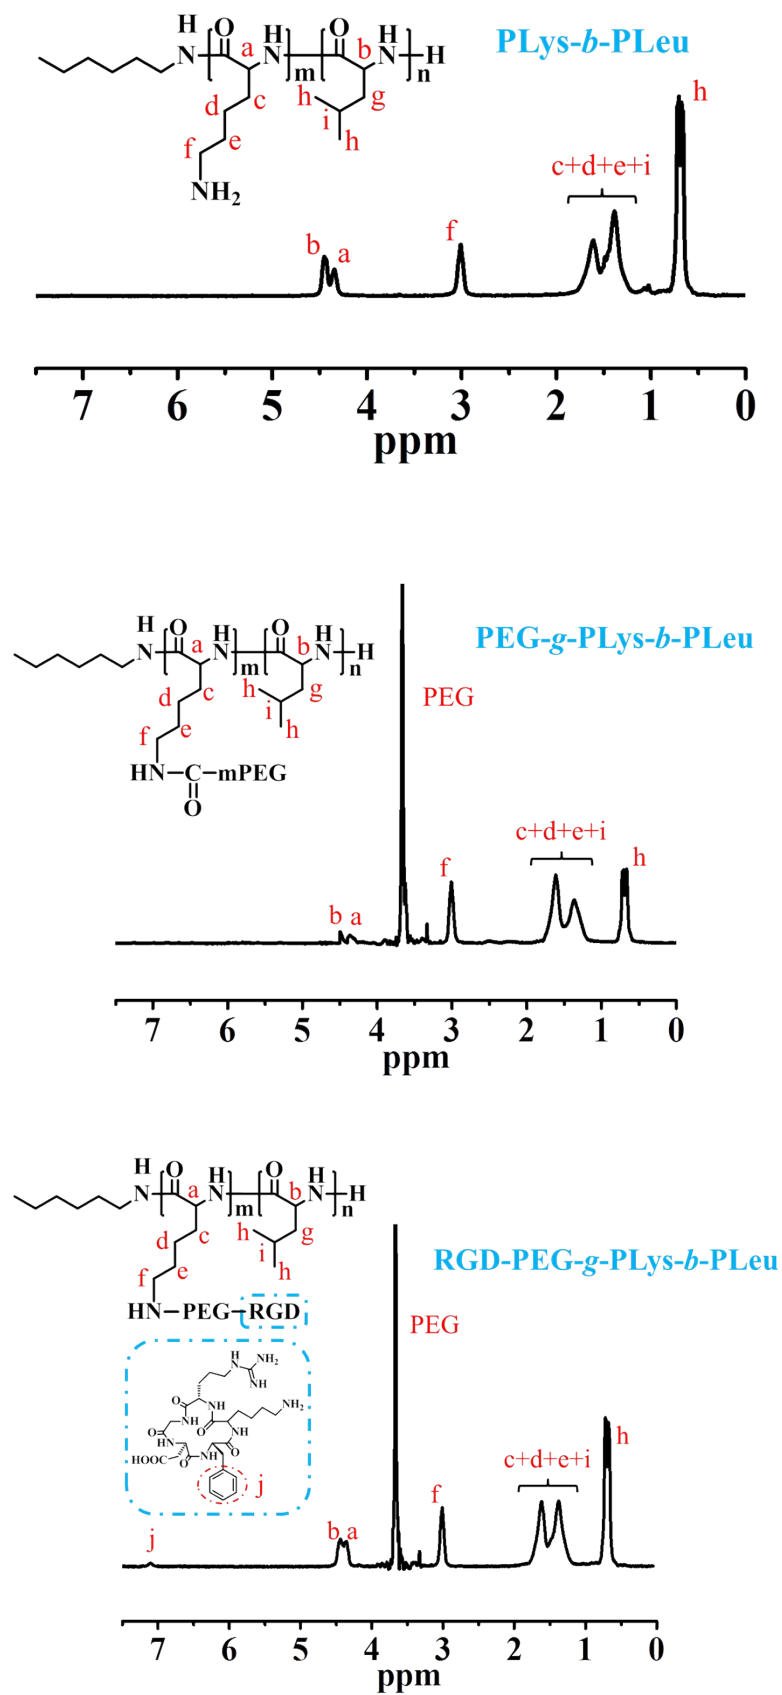

**Figure S2** <sup>1</sup>H NMR spectra of PLys-*b*-PLeu, PEG-*g*-PLys-*b*-PLeu, and RGD-PEG-*g*-PLys-*b*-PLeu in *d*-TFA.

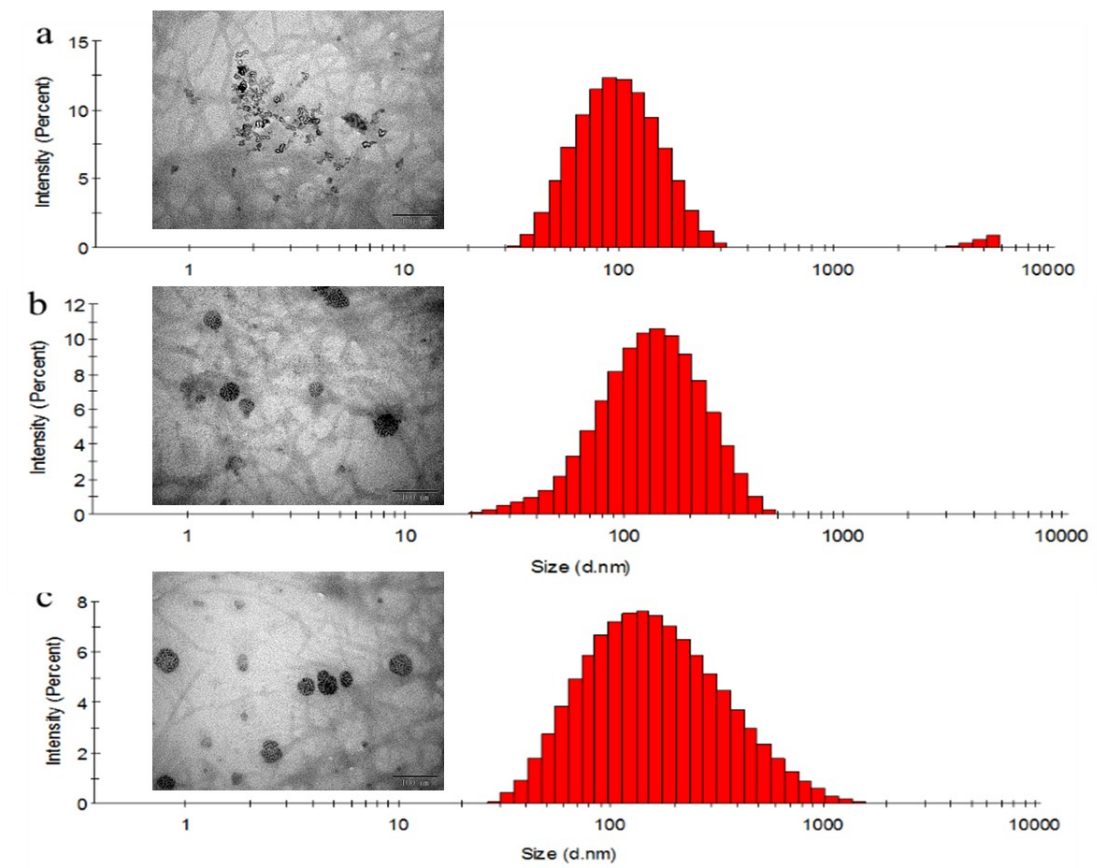

**Figure S3** Size distribution of DPP (a), DPPP (b) and DRPPP (c), scale bar is 100 nm.

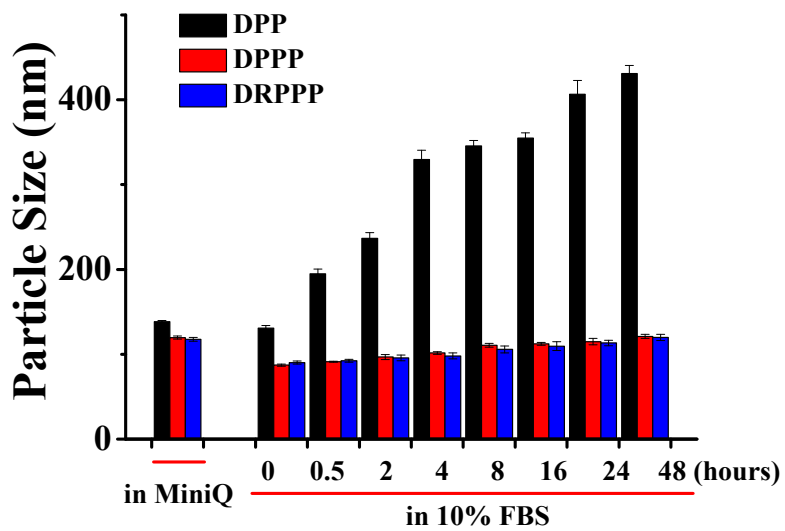

**Figure S4** Stability of DCPT loaded micelles in 10% FBS within 48 h.

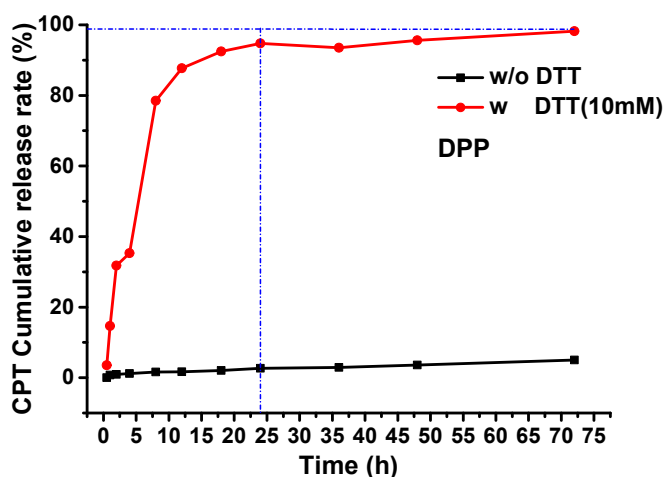

**Figure S5** In vitro release profile of CPT from DPP in PBS with or without DTT.

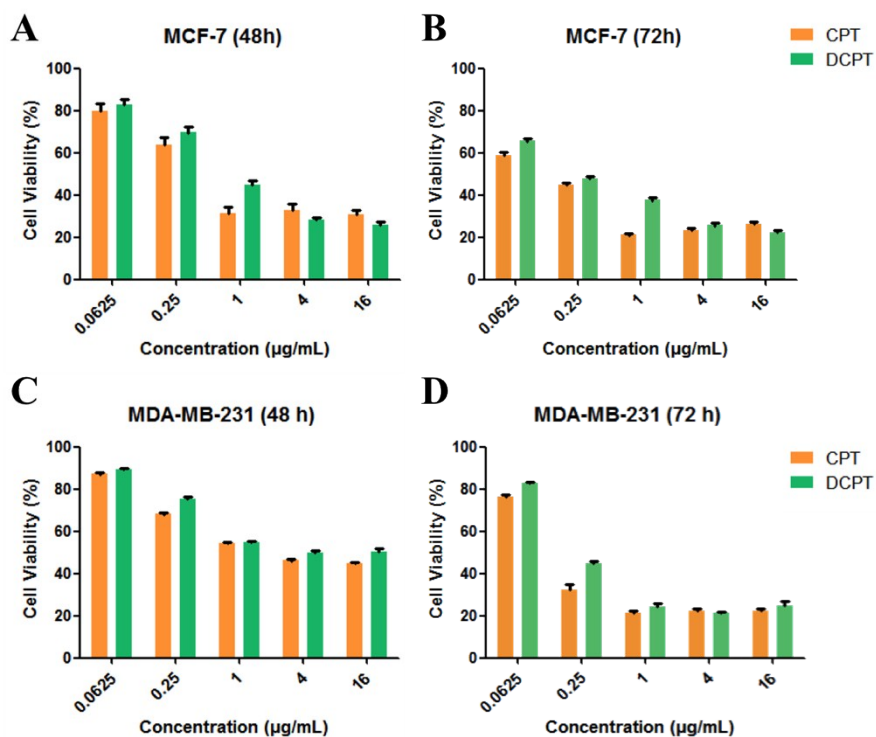

**Figure S6** Cytotoxicity of MCF-7 (A and B) and MDA-MB-231 (C and D) cells treated with CPT and DCPT for 48 h and 72 h.

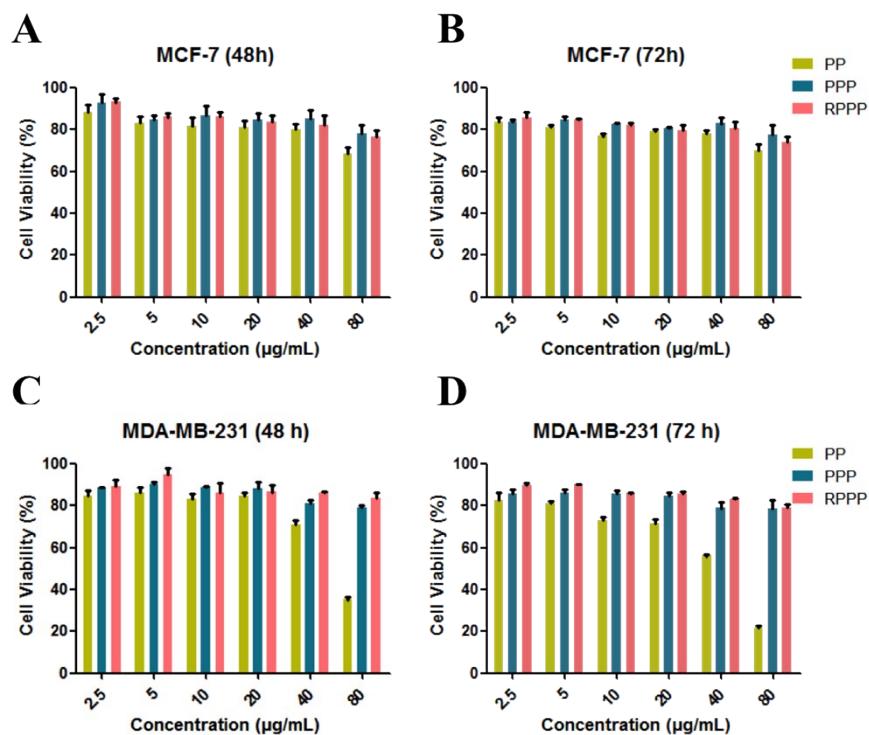

**Figure S7** Cytotoxicity of MCF-7 (A and B) and MDA-MB-231 (C and D) cells treated with PP, PPP and RPPP for 48 h and 72 h.

**Table S1** Degree of polymerization of PLys-*b*-PLeu calculated by <sup>1</sup>H NMR.

| Polymers                                          | Feed mol ratio of Lys (Z)- | Resultant mol ratio of        |
|---------------------------------------------------|----------------------------|-------------------------------|
|                                                   | NCA/Leu-NCA                | Lys/Leu by <sup>1</sup> H NMR |
| PLys <sub>30</sub> - <i>b</i> -PLeu <sub>20</sub> | 30/20                      | 30/19                         |
| PLys <sub>30</sub> - <i>b</i> -PLeu <sub>40</sub> | 30/40                      | 30/41                         |
| PLys <sub>30</sub> - <i>b</i> -PLeu <sub>60</sub> | 30/60                      | 30/62                         |

**Table S2** EE%, DL%, particle size and zeta potential of DCPT loaded micelles.

| <b>PLys-<i>b</i>-PLeu</b> | <b>PLys-<i>b</i>-PLeu<br/>/DCPT</b> | <b>EE (%)</b> | <b>DL (%)</b> | <b>Zeta potential<br/>(mV)</b> | <b>Particle<br/>sizes (nm)</b> | <b>PDI</b>   |
|---------------------------|-------------------------------------|---------------|---------------|--------------------------------|--------------------------------|--------------|
| <b>30-20</b>              | -                                   | -             | -             | <b>24.6</b>                    | <b>208.6</b>                   | <b>0.279</b> |
|                           | <b>2/1</b>                          | <b>46.8</b>   | <b>15.6</b>   | <b>51.1</b>                    | <b>81.7</b>                    | <b>0.255</b> |
|                           | <b>1/1</b>                          | <b>32.0</b>   | <b>16.0</b>   | <b>55.5</b>                    | <b>135.2</b>                   | <b>0.221</b> |
| <b>30-20</b>              | <b>1/1.5</b>                        | <b>9.1</b>    | <b>5.5</b>    | <b>49.8</b>                    | <b>186.5</b>                   | <b>0.256</b> |
|                           | <b>1/2</b>                          | <b>5.5</b>    | <b>3.7</b>    | <b>47.8</b>                    | <b>199.6</b>                   | <b>0.256</b> |
|                           | <b>1/2.5</b>                        | <b>2.7</b>    | <b>2.0</b>    | <b>44.1</b>                    | <b>210.2</b>                   | <b>0.216</b> |
| <b>30-40</b>              | -                                   | -             | -             | <b>36.0</b>                    | <b>117.5</b>                   | <b>0.299</b> |
|                           | <b>2/1</b>                          | <b>50.4</b>   | <b>16.8</b>   | <b>48.7</b>                    | <b>117.3</b>                   | <b>0.252</b> |
|                           | <b>1/1</b>                          | <b>37.5</b>   | <b>18.8</b>   | <b>51.1</b>                    | <b>154.3</b>                   | <b>0.392</b> |
| <b>30-40</b>              | <b>1/1.5</b>                        | <b>33.0</b>   | <b>18.0</b>   | <b>50.3</b>                    | <b>117.4</b>                   | <b>0.335</b> |
|                           | <b>1/2</b>                          | <b>77.6</b>   | <b>39.9</b>   | <b>41.7</b>                    | <b>129.9</b>                   | <b>0.251</b> |
|                           | <b>1/2.5</b>                        | <b>26.1</b>   | <b>17.4</b>   | <b>48.8</b>                    | <b>149.1</b>                   | <b>0.321</b> |
| <b>30-60</b>              | -                                   | -             | -             | <b>37.1</b>                    | <b>128.4</b>                   | <b>0.286</b> |
|                           | <b>2/1</b>                          | <b>45.8</b>   | <b>15.3</b>   | <b>52.3</b>                    | <b>133.1</b>                   | <b>0.285</b> |
|                           | <b>1/1</b>                          | <b>23.6</b>   | <b>11.8</b>   | <b>50.7</b>                    | <b>127.3</b>                   | <b>0.171</b> |
| <b>30-60</b>              | <b>1/1.5</b>                        | <b>25.2</b>   | <b>13.1</b>   | <b>51.6</b>                    | <b>91.5</b>                    | <b>0.182</b> |
|                           | <b>1/2</b>                          | <b>38.5</b>   | <b>25.7</b>   | <b>48.0</b>                    | <b>153.1</b>                   | <b>0.151</b> |
|                           | <b>1/2.5</b>                        | <b>2.2</b>    | <b>1.6</b>    | <b>49.1</b>                    | <b>101.1</b>                   | <b>0.199</b> |

**Table S3.** EE%, DL%, particle size and zeta potential of the CPT loaded micelles.

| PLys- <i>b</i> -PLeu | PLys- <i>b</i> -PLeu /CPT | EE (%) | DL (%) | Zeta potential (mV) | Particle size (nm) | PDI   |
|----------------------|---------------------------|--------|--------|---------------------|--------------------|-------|
| 30-20                | 10/1                      | 6.0    | 0.55   | 32.1                | 682.4              | 0.610 |
|                      | 5/1                       | 4.9    | 0.32   | 35.3                | 272.6              | 0.347 |
| 30-40                | 10/1                      | 5.2    | 0.5    | 30.3                | 588.9              | 0.691 |
|                      | 5/1                       | 10.4   | 0.9    | 33.2                | 346.1              | 0.600 |
| 30-60                | 10/1                      | 5.0    | 0.49   | 35.1                | 219.5              | 0.398 |
|                      | 5/1                       | 7.8    | 0.6    | 36.7                | 199.6              | 0.467 |

**Table S4.** IC<sub>50</sub> values in MDA-MB-231 cells

| Treatment samples | IC <sub>50</sub> (µg/mL)(48 h) | IC <sub>50</sub> (µg/mL)(72 h) |
|-------------------|--------------------------------|--------------------------------|
| Free CPT          | 4.02±1.14                      | 0.43±0.19                      |
| DPP               | 1.95±0.82                      | 0.46±0.23                      |
| DPPP              | 2.75±1.05                      | 0.47±0.12                      |
| DRPPP             | 1.60±0.62                      | 0.41±0.11                      |

**Table S5.** IC<sub>50</sub> values in MCF-7 cells

| Treatment samples | IC <sub>50</sub> (µg/mL)(48 h) | IC <sub>50</sub> (µg/mL)(72 h) |
|-------------------|--------------------------------|--------------------------------|
| Free CPT          | 0.38±0.22                      | 0.35±0.16                      |
| DPP               | 0.40±0.29                      | 0.75±0.37                      |
| DPPP              | 0.64±0.36                      | 0.95±0.53                      |
| DRPPP             | 0.65±0.43                      | 0.82±0.52                      |
